# Supplementary material for: Square planar Pd(ii)/oximate complexes as ‘metalloligands’ for the directional assembly of 4f-metal ions: a new family of {Ln2Pd} (Ln = lanthanide) clusters exhibiting slow magnetization relaxation
Source: Royal Society of Chemistry journal article supplement (doi:10.1039/d4dt02691h), 2024-11-25
Supplement: d4dt02691h1.pdf [file d4dt02691h1.pdf]

**Square planar Pd(II)/oximate complexes as ‘metalloligands’ for the directional assembly of 4f-metal ions: A new family of {Ln<sub>2</sub>Pd} (Ln = lanthanide) clusters exhibiting slow magnetization relaxation**

**Konstantinos N. Pantelis,<sup>a</sup> Catherine P. Raptopoulou,<sup>b</sup> Vassilis Psycharis,<sup>\*b</sup> Jinkui Tang,<sup>c</sup> and Theocharis C. Stamatatos<sup>\*,a,d</sup>**

<sup>a</sup> Department of Chemistry, University of Patras, 26504 Patras, Greece. E-mail: [thstama@upatras.gr](mailto:thstama@upatras.gr); Tel: +30 2610 996730.

<sup>b</sup> Institute of Nanoscience and Nanotechnology, NCSR “Demokritos”, Aghia Paraskevi Attikis 15310, Greece. E-mail: [v.psycharis@inn.demokritos.gr](mailto:v.psycharis@inn.demokritos.gr); Tel.: +30-2106503346.

<sup>c</sup> State Key Laboratory of Rare Earth Resource Utilization, Changchun Institute of Applied Chemistry, Chinese Academy of Sciences, Changchun 130022, P. R. China.

<sup>d</sup> Institute of Chemical Engineering Sciences, Foundation for Research and Technology – Hellas (FORTH/ICE – HT), Platani, P.O. Box 1414, 26504, Patras, Greece.

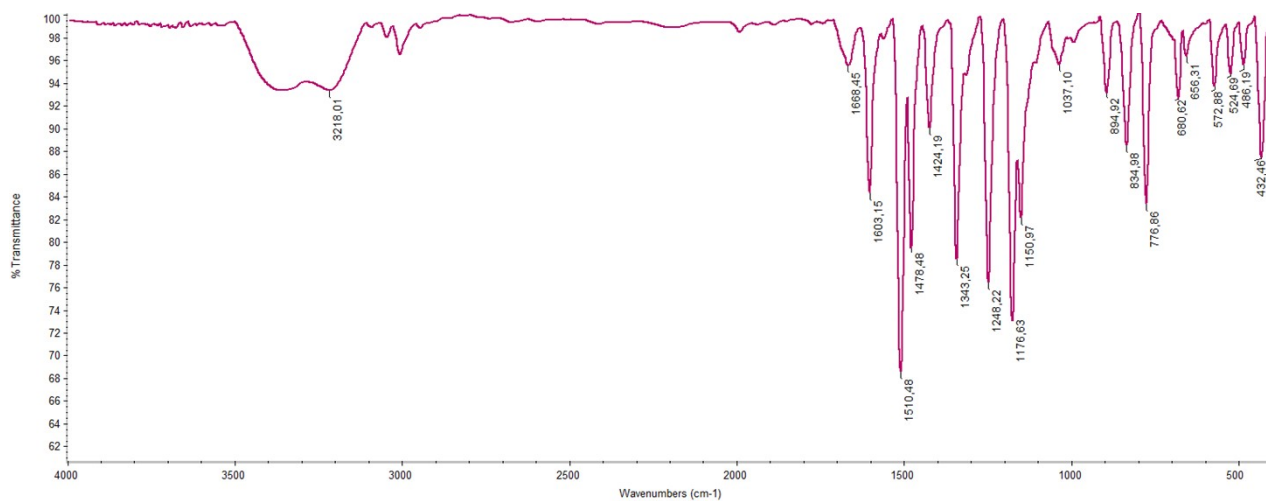

**Figure S1.** FT-IR spectrum of the 'metalloligand' [Pd(pao)<sub>2</sub>] (**1**).

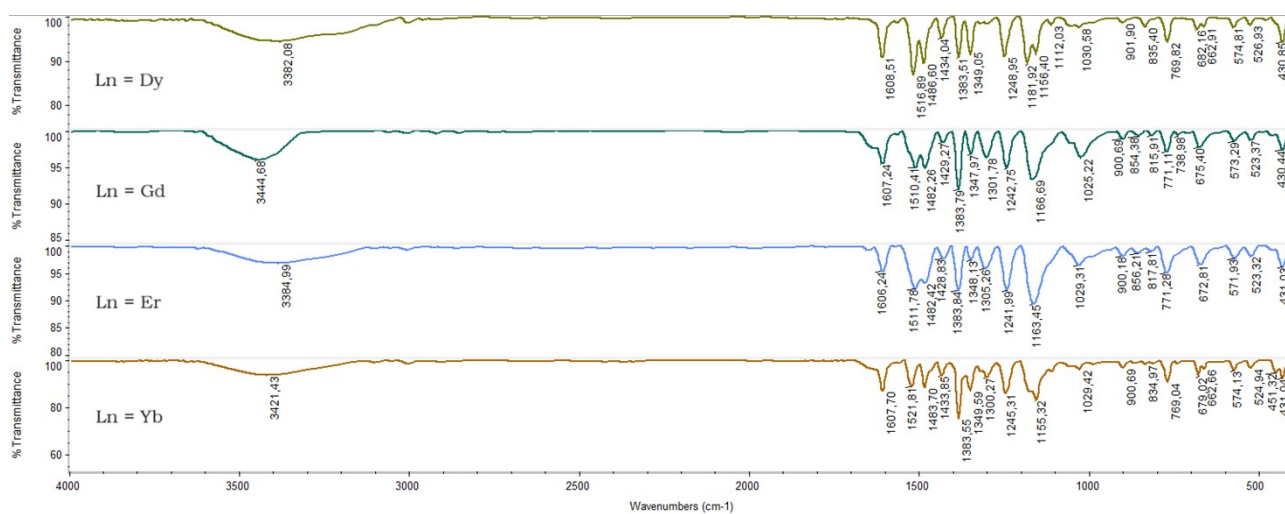

**Figure S2.** FT-IR spectra of [Ln<sub>2</sub>Pd(pao)<sub>2</sub>(NO<sub>3</sub>)<sub>6</sub>(MeOH)<sub>2</sub>(H<sub>2</sub>O)<sub>2</sub>]·[Pd(pao)<sub>2</sub>]<sub>4</sub> complexes, where Ln<sup>III</sup> = Dy (**2**), Gd (**3**), Er (**4**), Yb (**5**).

**Table S1.** Crystallographic data for compounds 1-5.

| Parameter                                                              | 1                                                             | 2                                                               | 3                                                               | 4                                                               | 5                                                               |
|------------------------------------------------------------------------|---------------------------------------------------------------|-----------------------------------------------------------------|-----------------------------------------------------------------|-----------------------------------------------------------------|-----------------------------------------------------------------|
| Formula                                                                | C <sub>12</sub> H <sub>14</sub> N <sub>4</sub> O <sub>4</sub> | C <sub>62</sub> H <sub>62</sub> N <sub>26</sub> O <sub>32</sub> | C <sub>62</sub> H <sub>62</sub> N <sub>26</sub> O <sub>32</sub> | C <sub>62</sub> H <sub>62</sub> N <sub>26</sub> O <sub>32</sub> | C <sub>62</sub> H <sub>62</sub> N <sub>26</sub> O <sub>32</sub> |
|                                                                        | Pd                                                            | Pd <sub>5</sub> Dy <sub>2</sub>                                 | Pd <sub>5</sub> Gd <sub>2</sub>                                 | Pd <sub>5</sub> Er <sub>2</sub>                                 | Pd <sub>5</sub> Yb <sub>2</sub>                                 |
| $F_w / \text{g mol}^{-1}$                                              | 384.67                                                        | 2540.37                                                         | 2529.87                                                         | 2549.89                                                         | 2561.45                                                         |
| Crystal system                                                         | Monoclinic                                                    | Triclinic                                                       | Triclinic                                                       | Triclinic                                                       | Triclinic                                                       |
| Space group                                                            | $P2_1/a$                                                      | $P-1$                                                           | $P-1$                                                           | $P-1$                                                           | $P-1$                                                           |
| $a / \text{Å}$                                                         | 4.5772(2)                                                     | 12.1673(2)                                                      | 12.1672(7)                                                      | 12.1819(6)                                                      | 12.1945(11)                                                     |
| $b / \text{Å}$                                                         | 18.3853(10)                                                   | 12.7713(2)                                                      | 12.7842(5)                                                      | 12.7650(5)                                                      | 12.7509(12)                                                     |
| $c / \text{Å}$                                                         | 8.1572(4)                                                     | 13.0477(2)                                                      | 13.0950(7)                                                      | 13.0467(6)                                                      | 13.0041(14)                                                     |
| $\alpha / ^\circ$                                                      | 90                                                            | 91.807(1)                                                       | 91.639(1)                                                       | 91.676(1)                                                       | 91.610(3)                                                       |
| $\beta / ^\circ$                                                       | 95.268(2)                                                     | 96.213(1)                                                       | 96.348(1)                                                       | 96.338(1)                                                       | 96.362(3)                                                       |
| $\gamma / ^\circ$                                                      | 90                                                            | 98.618(1)                                                       | 98.546(1)                                                       | 98.823(1)                                                       | 98.873(3)                                                       |
| $V / \text{Å}^3$                                                       | 683.55(6)                                                     | 1990.49(5)                                                      | 1999.83(18)                                                     | 1990.32(16)                                                     | 1983.4(3)                                                       |
| $Z$                                                                    | 2                                                             | 1                                                               | 1                                                               | 1                                                               | 1                                                               |
| $T / \text{K}$                                                         | 160(2)                                                        | 160(2)                                                          | 160(2)                                                          | 160(2)                                                          | 160(2)                                                          |
| Radiation / $\mu$                                                      | MoK $\alpha$ /                                                | MoK $\alpha$ /                                                  | MoK $\alpha$ /                                                  | MoK $\alpha$ /                                                  | MoK $\alpha$ /                                                  |
| (mm <sup>-1</sup> )                                                    | 1.380                                                         | 3.060                                                           | 2.835                                                           | 3.291                                                           | 3.544                                                           |
| $\rho_{\text{calcd}} / \text{g cm}^{-3}$                               | 1.869                                                         | 2.119                                                           | 2.101                                                           | 2.127                                                           | 2.144                                                           |
| Reflections                                                            | 10715/1551                                                    | 45752/8668                                                      | 31987/8633                                                      | 36544/8656                                                      | 21947/5154                                                      |
| collected/unique                                                       | (0.0343)                                                      | (0.0196)                                                        | (0.0736)                                                        | (0.0637)                                                        | (0.0897)                                                        |
| ( $R_{\text{int}}$ )                                                   |                                                               |                                                                 |                                                                 |                                                                 |                                                                 |
| Reflections with $I > 2\sigma(I)$                                      | 1137                                                          | 8109                                                            | 6372                                                            | 6793                                                            | 3749                                                            |
| No. of parameters                                                      | 197                                                           | 810                                                             | 825                                                             | 811                                                             | 782                                                             |
| $R_1 [I > 2\sigma(I)]$ , $wR_2 [I > 2\sigma(I)]^{a,b}$                 | 0.0206,<br>0.0453                                             | 0.0231,<br>0.0496                                               | 0.0489,<br>0.1019                                               | 0.0410,<br>0.0899                                               | 0.0539,<br>0.1227                                               |
| $R_1$ (all data), $wR_2$ (all data) <sup>a,b</sup>                     | 0.0334,<br>0.0492                                             | 0.0256,<br>0.0502                                               | 0.0713,<br>0.1114                                               | 0.0568,<br>0.0976                                               | 0.0766,<br>0.1375                                               |
| $(\Delta/\sigma)_{\text{max}}$                                         | 0.026                                                         | 0.024                                                           | 0.027                                                           | 0.014                                                           | 0.007                                                           |
| $\Delta\rho_{\text{max}}/\Delta\rho_{\text{min}}$ (e Å <sup>-3</sup> ) | 0.68/-0.30                                                    | 1.42/-0.67                                                      | 1.72/-1.06                                                      | 1.71/-1.17                                                      | 1.42/-1.45                                                      |
| CCDC number                                                            | 2385399                                                       | 2385400                                                         | 2385401                                                         | 2385402                                                         | 2385403                                                         |

$^a w = 1 / [\sigma^2(F_o^2) + (aP)^2 + bP]$ , where  $P = [\max(F_o^2, 0) + 2F_c^2] / 3$ ;  $a = 0.0258$ ,  $b = 0.1879$  for **1**;  $a = 0.0173$ ,  $b = 2.7355$  for **2**;  $a = 0.0400$ ,  $b = 4.7272$  for **3**;  $a = 0.0388$ ,  $b = 4.0253$  for **4**;  $a = 0.0597$ ,  $b = 6.5554$  for **5**;  $^b R_1 = \Sigma(|F_o| - |F_c|) / \Sigma(|F_o|)$  and  $wR_2 = \{\Sigma[w(F_o^2 - F_c^2)^2] / \Sigma[w(F_o^2)^2]\}^{1/2}$ .

**Table S2.** Selected bond distances (Å) and bond angles (°) for complex **1**.

| <b>Bond Distances (Å)</b> |          |              |          |
|---------------------------|----------|--------------|----------|
| Pd-N1A                    | 2.039(4) | Pd-N2A       | 2.060(9) |
| Pd-N1A'                   | 2.039(4) | Pd-N2A'      | 2.060(9) |
| <b>Bond Angles (°)</b>    |          |              |          |
| N2A-Pd-N1A                | 80.2(2)  | N2A'-Pd-N1A' | 80.2(2)  |
| N2A-Pd-N1A'               | 99.8(2)  | N1A-Pd-N1A'  | 180.0    |
| N2A'-Pd-N1A               | 99.8(2)  | N2A-Pd-N2A'  | 180.0    |

Symmetry code: (')  $-x, 2-y, 2-z$ .

**Table S3.** Selected bond distances (Å) and bond angles (°) for complex **2**.

| <b>Bond Distances (Å)</b> |            |            |            |
|---------------------------|------------|------------|------------|
| Pd1-N1A                   | 2.042(3)   | Dy1-O2     | 2.469(3)   |
| Pd1-N1A'                  | 2.042(3)   | Dy1-O3     | 2.449(3)   |
| Pd1-N2A                   | 2.038(5)   | Dy1-O5     | 2.487(2)   |
| Pd1-N2A'                  | 2.038(5)   | Dy1-O6     | 2.457(2)   |
| Dy1-O1A                   | 2.29(3)    | Dy1-O8     | 2.433(2)   |
| Dy1-O1W                   | 2.286(2)   | Dy1-O9     | 2.519(2)   |
| Dy1-O1M                   | 2.340(2)   |            |            |
| <b>Bond Angles (°)</b>    |            |            |            |
| N2A-Pd1-N1A               | 78.95(17)  | O6-Dy1-O5  | 51.40(8)   |
| N2A-Pd1-N1A'              | 101.05(17) | O6-Dy1-O9  | 121.28(8)  |
| N2A'-Pd1-N1A              | 101.05(17) | O8-Dy1-O2  | 143.75(10) |
| N2A'-Pd1-N1A'             | 78.95(17)  | O8-Dy1-O3  | 141.94(9)  |
| N1A-Pd1-N1A'              | 180.0      | O8-Dy1-O5  | 69.49(8)   |
| N2A-Pd1-N2A'              | 180.0      | O8-Dy1-O6  | 74.41(8)   |
| O1A-Dy1-O2                | 80.3(5)    | O8-Dy1-O9  | 51.13(7)   |
| O1A-Dy1-O3                | 87.4(7)    | O1M-Dy1-O2 | 75.88(11)  |
| O1A-Dy1-O5                | 148.7(8)   | O1M-Dy1-O3 | 127.39(10) |

|             |           |             |            |
|-------------|-----------|-------------|------------|
| O1A-Dy1-O6  | 152.6(6)  | O1M-Dy1-O5  | 125.25(8)  |
| O1A-Dy1-O8  | 124.4(6)  | O1M-Dy1-O6  | 77.64(8)   |
| O1A-Dy1-O9  | 73.3(6)   | O1M-Dy1-O8  | 79.74(10)  |
| O1A-Dy1-O1M | 86.0(8)   | O1M-Dy1-O9  | 73.21(9)   |
| O2-Dy1-O5   | 103.95(9) | O1W-Dy1-O1A | 77.0(7)    |
| O2-Dy1-O9   | 140.29(9) | O1W-Dy1-O2  | 123.57(10) |
| O3-Dy1-O2   | 51.57(10) | O1W-Dy1-O3  | 76.29(9)   |
| O3-Dy1-O5   | 72.67(9)  | O1W-Dy1-O5  | 75.01(8)   |
| O3-Dy1-O6   | 85.34(9)  | O1W-Dy1-O6  | 126.38(8)  |
| O3-Dy1-O9   | 151.35(9) | O1W-Dy1-O8  | 90.10(9)   |
| O5-Dy1-O9   | 114.07(8) | O1W-Dy1-O9  | 78.82(8)   |
| O6-Dy1-O2   | 74.45(9)  | O1W-Dy1-O1M | 150.47(9)  |

---

Symmetry code: (')  $-x, -y, 1-z$ .

**Table S4.** Continuous Shape Measurement (CShM) values for the potential coordination polyhedra of the 9-coordinate Dy1/Dy1' centers in complex **2**.

| Polyhedron <sup>a,b</sup> | Dy1/Dy1'    |
|---------------------------|-------------|
| EP                        | 34.64       |
| OPY                       | 21.86       |
| HBPY                      | 16.58       |
| JTC                       | 14.43       |
| JCCU                      | 9.62        |
| CCU                       | 8.19        |
| JCSAPR                    | 3.35        |
| CSAPR                     | 2.57        |
| JTCTPR                    | 3.60        |
| TCTPR                     | 2.82        |
| JTDIC                     | 12.03       |
| HH                        | 8.99        |
| <b>MF</b>                 | <b>2.43</b> |

<sup>a</sup>Abbreviations: EP, Enneagon; OPY, Octagonal pyramid; HBPY, Heptagonal bipyramid; JTC, Johnson triangular cupola; JCCU, Capped cube; CCU, Spherical-relaxed capped cube; JCSAPR, Capped square antiprism, CSAPR-9, Spherical capped square antiprism; JTCTPR, Tricapped trigonal prism; TCTPR, Spherical tricapped

trigonal prism; JTDIC, Tridiminished icosahedron, HH, Hula-hoop; MFF, Muffin. <sup>b</sup>The value in boldface indicates the closest polyhedron according to Continuous Shape Measures.

**Table S5.** Hydrogen bonding interactions in the crystal structure of **1·2H<sub>2</sub>O**. Abbreviations: D = Donor; A = Acceptor

| <i>D—H···A</i>                      | <i>D—H</i> (Å) | <i>H···A</i> (Å) | <i>D···A</i> (Å) | <i>D—H···A</i> (°) |
|-------------------------------------|----------------|------------------|------------------|--------------------|
| Intramolecular                      |                |                  |                  |                    |
| <i>C6A—H6A···O1A<sup>i</sup></i>    | 0.95           | 2.15             | 2.947(10)        | 140                |
| <i>C6B—H6B···O1B<sup>i</sup></i>    | 0.95           | 2.13             | 2.924(16)        | 141                |
| Intermolecular                      |                |                  |                  |                    |
| <i>C5A—H5A···O1A<sup>ii</sup></i>   | 0.95           | 2.86(1)          | 3.343(12)        | 113(1)             |
| <i>C1B—H1B···O1B<sup>iii</sup></i>  | 0.95           | 2.44(1)          | 3.194(2)         | 136.1(5)           |
| <i>*O1W—H1WA···O1A<sup>iv</sup></i> | 0.80(5)        | 2.01(4)          | 2.80(3)          | 170(4)             |
| <i>*O1W—H1WA···O1B<sup>v</sup></i>  | 0.80(5)        | 2.01(4)          | 2.79(3)          | 166(4)             |
| <i>*O1W—H1WB···O1W<sup>vi</sup></i> | 0.74(5)        | 1.98(5)          | 2.69(4)          | 163(5)             |

\*Only the parameters for water molecules occupying sites A are given.

Symmetry codes: (i)  $-x, -y+2, -z+2$ ; (ii)  $x, y, z-1$ ; (iii)  $-x, -y+2, -z+1$ ; (iv)  $x+1, y, z-1$ ; (v)  $-x+1, -y+2, -z+1$ ; (vi)  $x+1/2, -y+3/2, z$ .

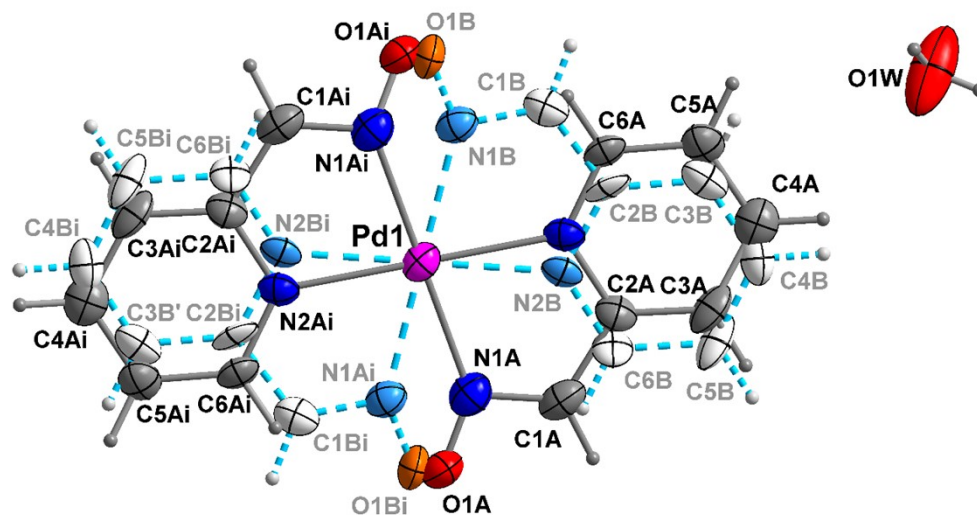

(a)

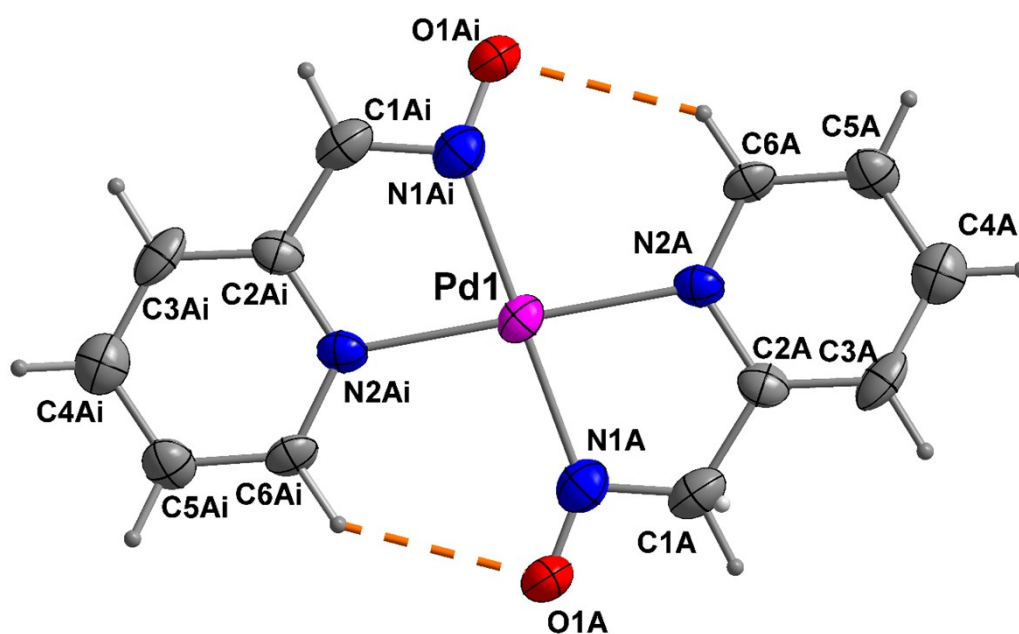

(b)

**Figure S3.** (a) Fully labelled ORTEP plot of  $1 \cdot 2\text{H}_2\text{O}$ . Atoms labeled as “A” and “B” indicate the two disordered orientations of the ligands. Dashed cyan lines connect the atoms in orientation B. The atoms occupying sites B are decorated with lighter colors. (b) Fully labelled ORTEP plot of **1** using the disordered orientation which corresponds to A atoms; the dashed orange lines highlight the C6A—H6A $\cdots$ O1A' intramolecular hydrogen bonds. Color scheme: Pd<sup>II</sup>, magenta; O, red; N, blue; C, gray. Symmetry code: (i):  $-x, 2-y, 2-z$ .

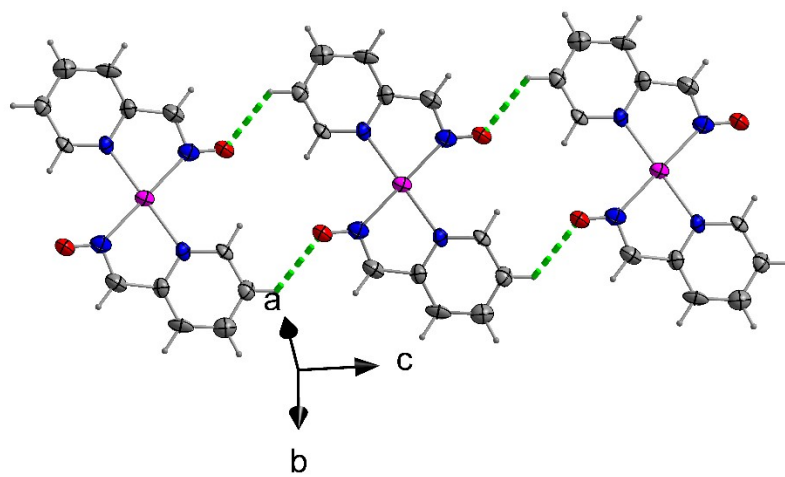

(a)

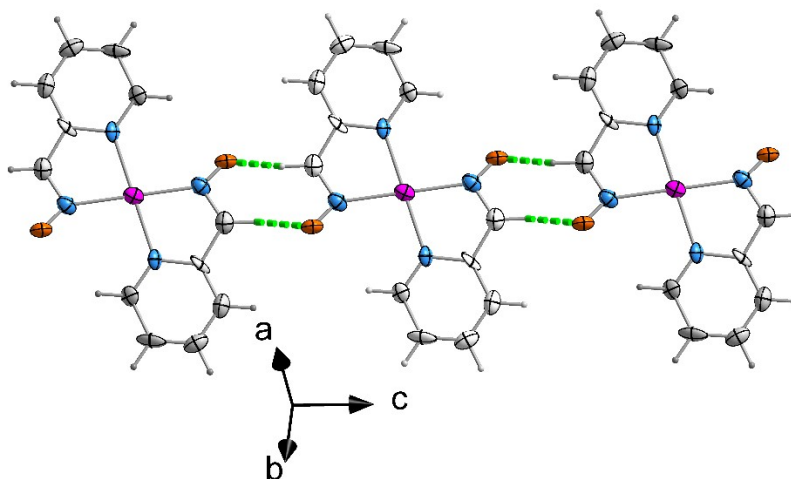

(b)

**Figure S4.** Intermolecular hydrogen bonds between the two disordered parts of the  $[\text{Pd}(\text{pao})_2]$  complexes in the structure of **1**. In (a), the hydrogen bonds developed among the A disordered parts and in (b) those developed among parts B are shown, i.e.  $\text{C5A-H5A}\cdots\text{O1A}^{\text{ii}}$  and  $\text{C1B-H1B}\cdots\text{O1B}^{\text{iii}}$  (symmetry codes are given in Table S5 or in the text). Color coding is as in Figure S3.



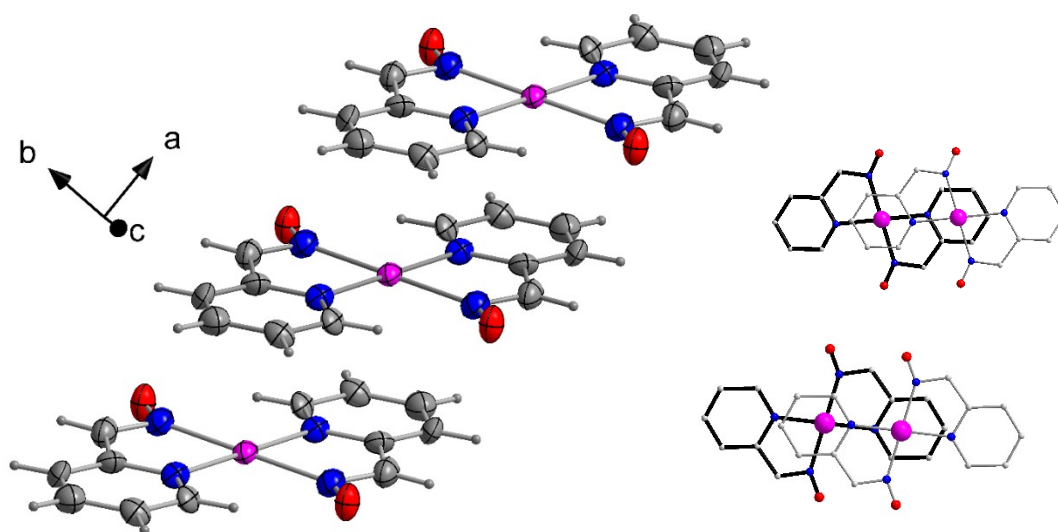

**Figure S5.** Stacking of  $[\text{Pd}(\text{pao})_2]$  complexes with the  $\text{pao}^-$  ligands in A-orientation. In the inset, the overlap type of neighboring complexes is shown for A-orientation (top) and B-orientation (bottom). Those at the top are with light colors. Color coding as in Figure S3.

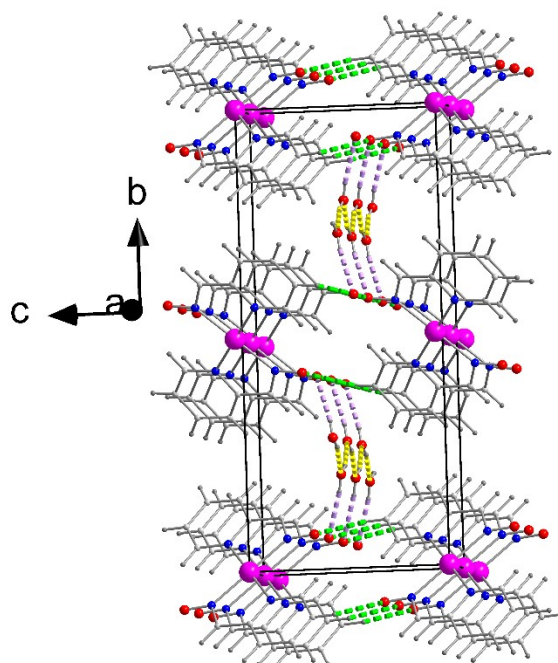

**Figure S6.** 3-D architecture of the structure of  $1 \cdot 2\text{H}_2\text{O}$ . The  $\text{pao}^-$  ligands and water lattice solvent molecules are presented only occupying site A. Dashed green, yellow and violet lines highlight the  $\text{C5A-H5A} \cdots \text{O1A}^{\text{ii}}$ ,  $\text{O1WA-H2W} \cdots \text{O1WA}^{\text{vi}}$  and  $\text{O1WA}$ -



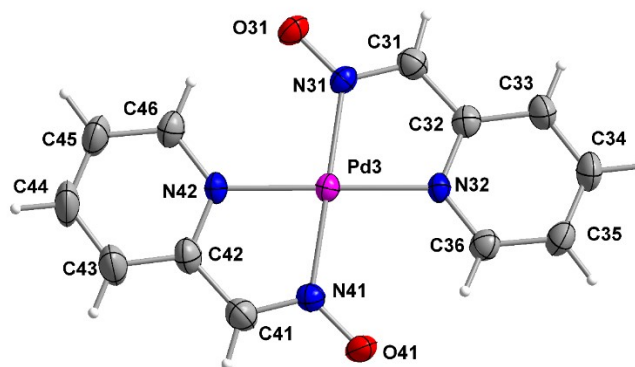

(c)

**Figure S7.** Ortep-type views of the complexes (a) **2A**, (b) **2B**, and (c) **2C** that are present in the structure of **2**. Atoms labeled as A and B in (a) and (b) indicate the two disordered orientations of the  $\text{pao}^-$  ligands. Dashed cyan lines connect the atoms in orientation B and the atoms occupying sites A are highlighted with lighter colors. Symmetry code ('):  $-x, -y, 1-z$ .

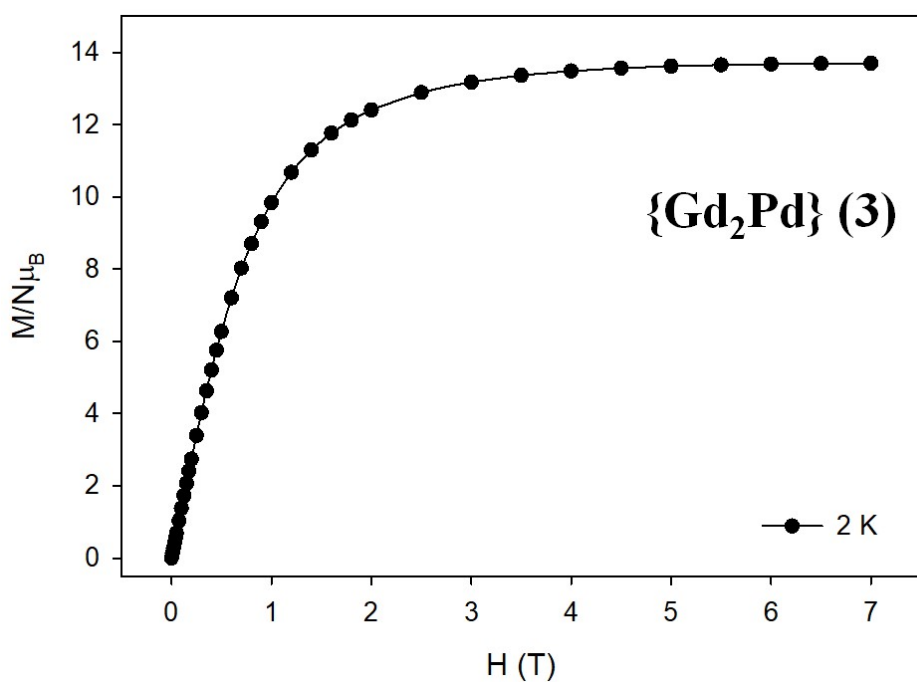

**Figure S8.** Plot of magnetization ( $M$ ) vs. field ( $H$ ) for complex **3** at 2 K. The solid line is guide for the eye only.

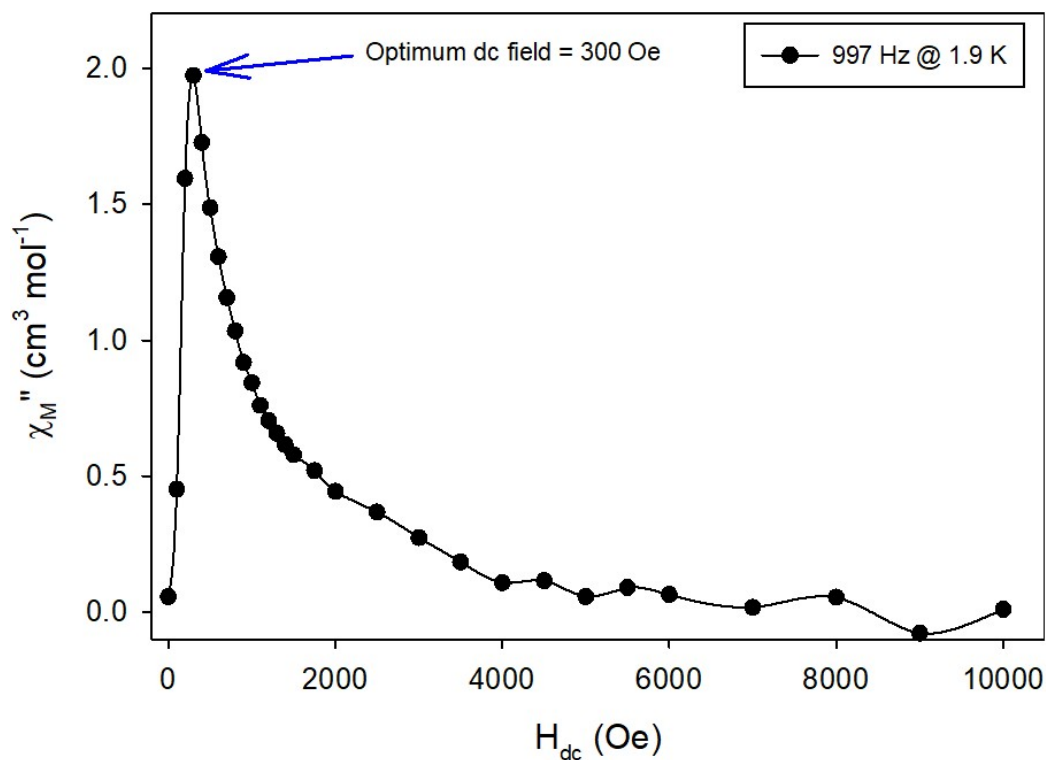

**Figure S9.** Plot of out-of-phase *ac* magnetic susceptibility ( $\chi''_M$ ) vs. field (*H*) for complex 2 at 1.9 K, indicating an optimum *dc* field at 300 Oe.

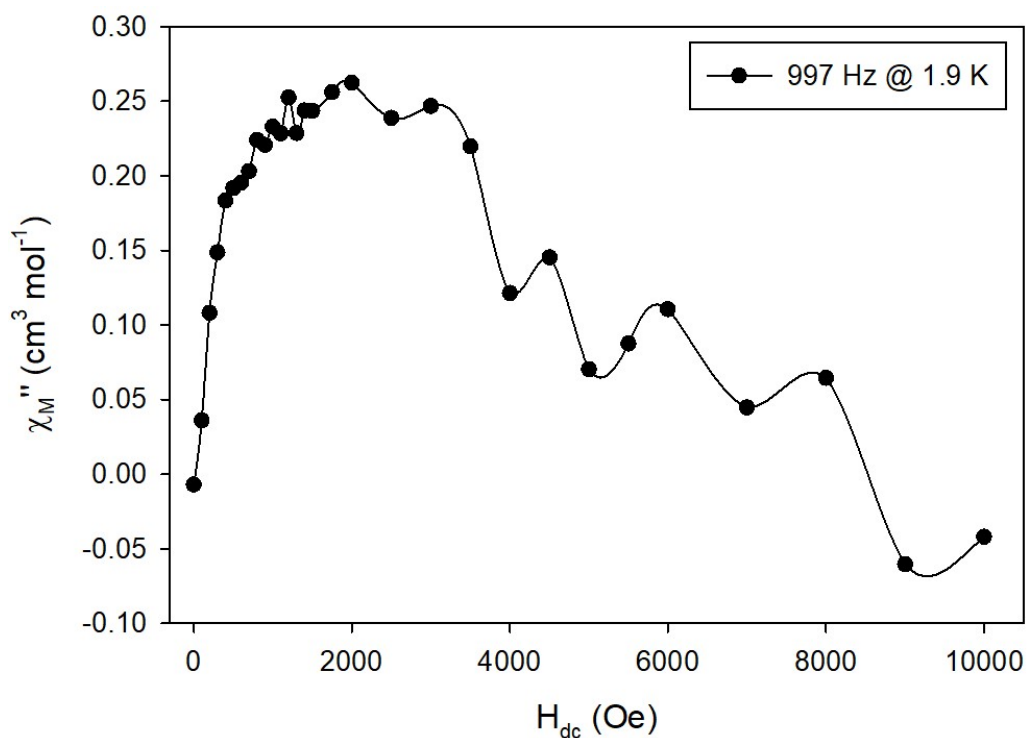

**Figure S10.** Plot of out-of-phase *ac* magnetic susceptibility ( $\chi''_M$ ) vs. field (*H*) for complex 5 at 1.9 K, indicating an optimum *dc* field at 2000 Oe.

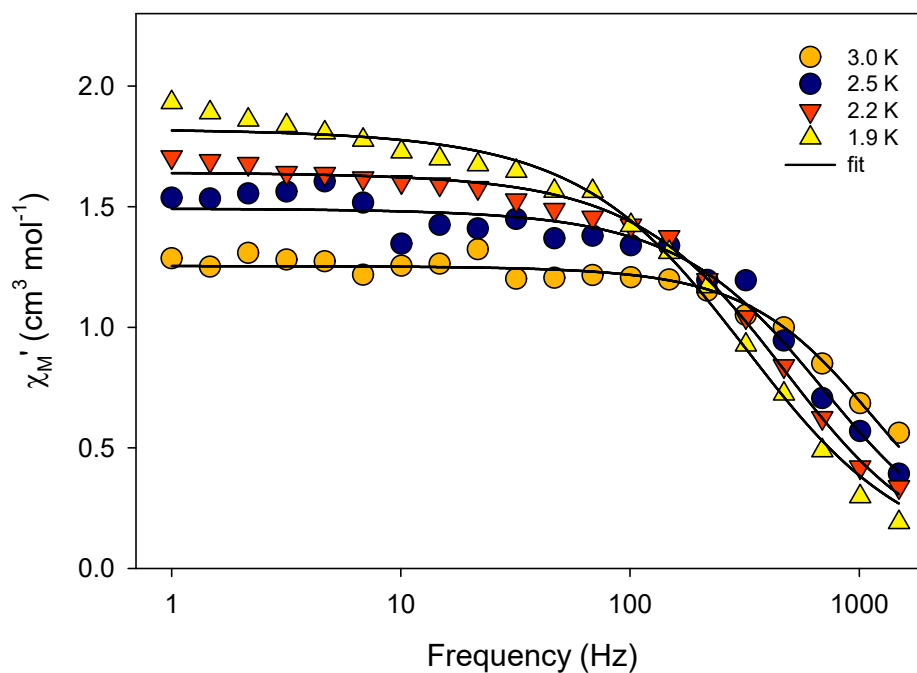

**Figure S11.** Frequency dependence of the in-phase ( $\chi'_{M}$ ) *ac* magnetic susceptibility under a 2000 Oe applied optimum *dc* field for complex **5**. Solid lines correspond to the best fit obtained with a generalized Debye model.

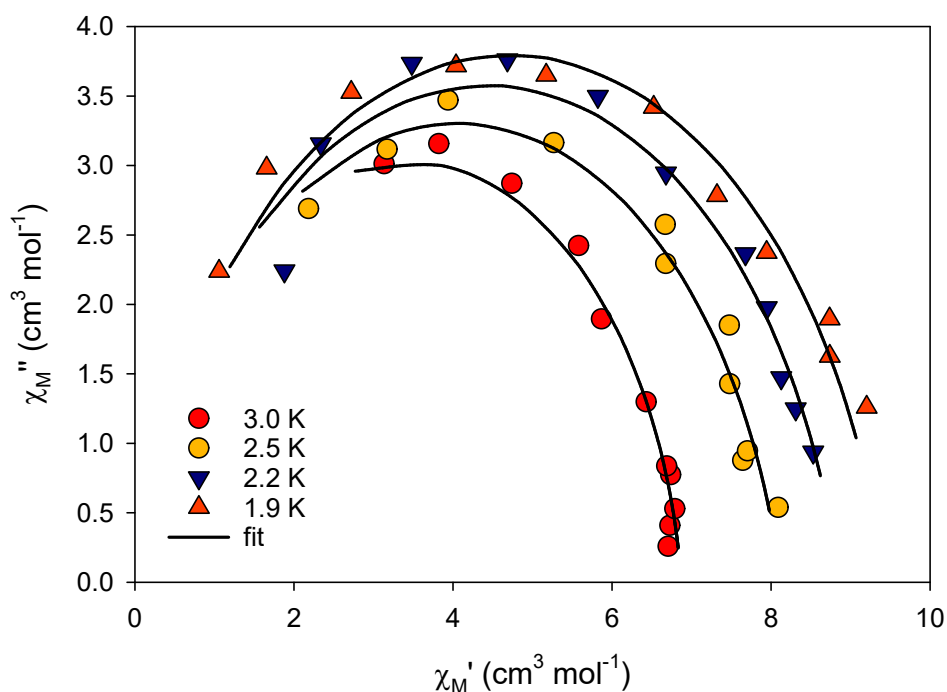

**Figure S12.** Cole-Cole plot for complex **5** obtained using the *ac* susceptibility data under a 2000 Oe applied *dc* field at the temperature range 1.9-3.0 K. The solid lines correspond to the best fit obtained with a generalized Debye model.
